# Supplementary material for: Enabling high-mobility, ambipolar charge-transport in a DPP-benzotriazole copolymer by side-chain engineering
Source: Royal Society of Chemistry journal article supplement (doi:10.1039/c5sc01326g), 2015-01-01
Supplement: c5sc01326g1.pdf [file c5sc01326g1.pdf]

## Supporting Information:

### Enabling high-mobility, ambipolar charge-transport in a DPP-Benzotriazole copolymer by side-chain engineering

Mathias Gruber,<sup>†a</sup> Seok-Heon Jung,<sup>†b</sup> Sam Schott,<sup>a</sup> Deepak Venkateshvaran,<sup>a</sup> Auke Jisk Kronemeijer,<sup>a</sup> Jens Wenzel Andreasen,<sup>c</sup> Christopher R McNeill,<sup>d</sup> Wallace W. H. Wong,<sup>e</sup> Munazza Shahid,<sup>f</sup> Martin Heeney,<sup>f</sup> Jin-Kyun Lee<sup>b</sup> and Henning Sirringhaus<sup>a</sup>

#### Material NMR and Synthesis

##### Raw materials and solvents

K<sub>2</sub>CO<sub>3</sub>, Na<sub>2</sub>CO<sub>3</sub>, 18-crown-6, KHF<sub>2</sub> (3 M solution in water), phenylboronic acid, bromobenzene, Pd(PPh<sub>3</sub>)<sub>4</sub>, Pd(dppf)Cl<sub>2</sub> · DCM complex were purchased from Sigma-Aldrich and used as received. Dioxane (inhibitor-free, anhydrous), toluene (anhydrous), DMF (anhydrous), were received from Sigma-Aldrich and used without further drying.

##### NMR

<sup>1</sup>H NMR spectra were recorded on a Varian Inova-400 (400 MHz) spectrometer at roomtemperature using the chemical shift of the residual protic solvent (CHCl<sub>3</sub> at δ 7.24 ppm and DMSO at δ 2.50 ppm) as the internal reference. All chemical shifts are quoted in parts per million (ppm) relative to the internal reference and the coupling constants *J* are measured in Hz. The multiplicity of the signal is indicated as follows: s (singlet), d (doublet), t (triplet), q (quartet), m (multiplet), and br s (broad singlet). <sup>13</sup>C NMR spectra were recorded on a Varian Inova-400 (101 MHz) spectrometer using the central resonance of the triplet of CDCl<sub>3</sub> at δ 77.0 ppm or the septet of DMSO-d<sub>6</sub> at δ 40.0 ppm as a reference. <sup>19</sup>F NMR spectra were recorded on a Varian Inova-400 (376 MHz) spectrometer at room temperature.

<sup>a</sup> Cavendish Laboratory, University of Cambridge, J J Thomson Avenue, Cambridge, CB3 0HE (United Kingdom). E-mail: hs220@cam.ac.uk

<sup>b</sup> Department of Polymer Science & Engineering, Inha University, Incheon, 402-751 (South Korea). E-mail: jkl36@inha.ac.kr

<sup>c</sup> Department of Energy Conversion and Storage, Technical University of Denmark, Frederiksborgvej 399, 4000 Roskilde (Denmark).

<sup>d</sup> Department of Materials Engineering, Monash University, Clayton, Victoria 3800 (Australia).

<sup>e</sup> School of Chemistry, Bio21 Institute, University of Melbourne, Parkville, Victoria 3010, (Australia).

<sup>f</sup> Department of Chemistry and Centre for Plastic Electronics, Imperial College, London, SW7 2AZ (United Kingdom). E-mail: m.heeney@imperial.ac.uk

† These authors contributed equally to this work. M. G. designed and performed the device fabrication and polymer characterization experiments, analysed the experimental data and wrote the paper while S-H. J. synthesized the polymers (I-C<sub>18</sub>)-DPP-(b-C<sub>17</sub>)-BTZ and (I-C<sub>18</sub>)-DPP-(I-C<sub>8</sub>)-BTZ and wrote the polymer synthesis sections.

DOI: 10.1039/x0xx00000x

## Synthesis

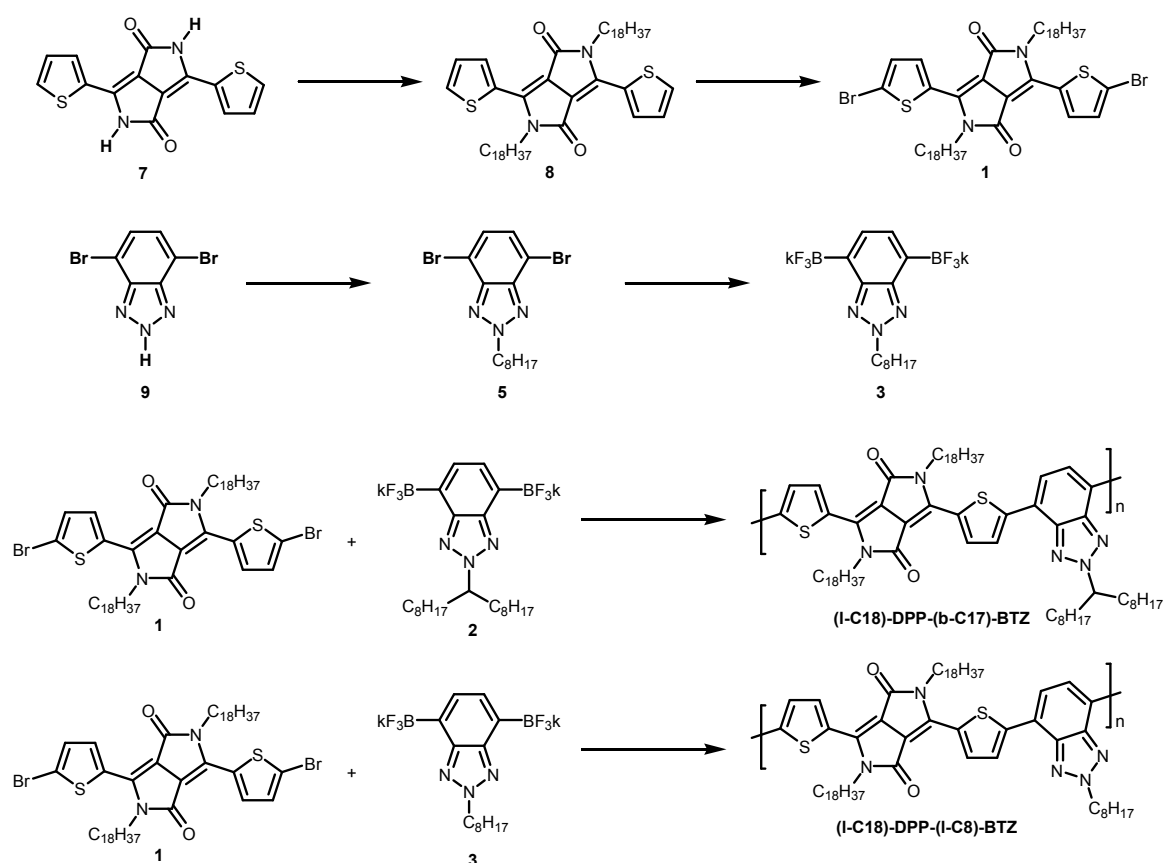

Scheme S 1. Synthesis of monomers and polymers.

### 2,5-dioctadecyl-3,6-di(thiophen-2-yl)pyrrolo[3,4-c]pyrrole-1,4(2*H*,5*H*)-dione [(I-C18)-DPP, **8**]

A round-bottomed flask was filled with 3,6-di(thiophen-2-yl)pyrrolo[3,4-c]pyrrole-1,4(2*H*-5*H*)-dione **7** (5.00 g, 16.6 mmol),<sup>[1]</sup> K<sub>2</sub>CO<sub>3</sub> (9.2 g, 67 mmol), 18-crown-6 (0.05 g), and DMF (anhydrous, 70 cm<sup>3</sup>). The reaction mixture was heated at 130 °C under N<sub>2</sub> atmosphere. 1-Bromooctadecane (17 g, 50 mmol) was added to the mixture by syringe. After the reaction was stirred for another 20 h at 130 °C, the solution was cooled to room temperature and poured into the ice-water mixture (200 cm<sup>3</sup>). The precipitate was filtered and rinsed with a copious amount of water. The filter cake was washed further with MeOH several times. The crude product was purified by column chromatography (silica gel, CHCl<sub>3</sub>) to give dark red **(I-C18)-DPP** (4.1 g, 31%); <sup>1</sup>H NMR (400 MHz, CDCl<sub>3</sub>, δ) 8.91 (2H, dd, *J* = 4 Hz, 1 Hz, Ar-H), 7.26 (2H, dd, *J* = 5 Hz, 1 Hz, Ar-H), 4.04 (4H, t, *J* = 8 Hz, NCH<sub>2</sub>), 1.72 (4H, m), 1.50 - 1.20 (60H, m), 0.85 (6H, t, *J* = 6 Hz, CH<sub>3</sub>) The δ<sub>H</sub> data was in agreement with the literature values.<sup>[2]</sup>

**3,6-bis(5-bromothiophene-2-yl)-2,5-dioctadecylpyrrolo[3,4-c]pyrrole-1,4(2*H*,5*H*)-dione [(I-C18)-DPP dibromide, 1]**

To a magnetically stirred solution of **(I-C18)-DPP 8** (1.80 g, 2.24 mmol) was dissolved into CHCl<sub>3</sub> (30 cm<sup>3</sup>). Br<sub>2</sub> (0.75 g, 4.7 mmol) dissolved in CHCl<sub>3</sub> (1.5 cm<sup>3</sup>) was added to the reaction vessel at room temperature. The mixture was stirred at room temperature for 30 min and then heated to 60 °C. After 2 h, the solution was cooled to room temperature and the precipitate was recovered by filtration. The filter cake was washed with Na<sub>2</sub>SO<sub>3</sub> solution, water, and methanol several times. The crude product was purified by column chromatography (silica gel, CHCl<sub>3</sub>) and then crystallized from CHCl<sub>3</sub> to give dark blue **(I-C18)-DPP dibromide** (1.8 g, 84%); <sup>1</sup>H NMR (400 MHz, CDCl<sub>3</sub>, δ) 8.67 (2H, d, *J* = 4 Hz, Ar-H), 7.24 (2H, t, *J* = 4 Hz, Ar-H), 3.97 (4H, t, *J* = 8 Hz, NCH<sub>2</sub>), 1.70 (4H, m), 1.45 - 1.20 (60H, m), 6.87 (6H, t, *J* = 7 Hz, CH<sub>3</sub>) The δ<sub>H</sub> data was in agreement with the literature values.<sup>[2]</sup>

**4,7-dibromo-2-octyl-2*H*-benzo[*d*][1,2,3]triazole [(I-C8)-BTZ dibromide, 5]**

A 250 cm<sup>3</sup> round-bottomed flask was filled with the 4,7-dibromobenzotriazole (9.00 g, 32.5 mmol) and K<sub>2</sub>CO<sub>3</sub> (8.9 g, 65 mmol). DMF (anhydrous, 80 cm<sup>3</sup>) was added to the flask and the solution was heated to 90 °C. 1-Bromooctane (6.9 g, 36 mmol) was added in one portion by syringe. After the reaction mixture was stirred at 90 °C for 2 h, the solution was cooled to room temperature and quenched by the addition of water (120 cm<sup>3</sup>). The product was extracted with Et<sub>2</sub>O (120 cm<sup>3</sup>). The organic layer was washed with brine (100 cm<sup>3</sup>), dried over anhydrous MgSO<sub>4</sub>, and concentrated under reduced pressure. The crude product was purified by column chromatography (silica gel, CH<sub>2</sub>Cl<sub>2</sub>:hexane = 1:3 by vol.) and then crystallized from an isopropanol/EtOAc mixture to give colourless crystalline **(I-C8)-BTZ dibromide** (8.2 g, 65%); <sup>1</sup>H NMR (400 MHz, CDCl<sub>3</sub>, δ) 7.44 (2H, s, Ar-H), 4.75 (2H, t, *J* = 7.5 Hz, NCH<sub>2</sub>), 2.15 - 2.10 (2H, m, NCH<sub>2</sub>CH<sub>2</sub>), 1.35 - 1.25 (10H, m), 0.86 (3H, t, *J* = 7.0, CH<sub>3</sub>) The δ<sub>H</sub> data was in agreement with the literature values.<sup>[3]</sup>

**Dipotassium [2-octyl-2*H*-benzotriazole]-4,7-bis(trifluoroborate) [dipotassium (I-C8)-BTZ bis(trifluoroborate), 3]**

To a Schlenk tube were added **(I-C8)-BTZ dibromide 3** (1.00 g, 2.57 mmol), KOAc (1.51 g, 15.2 mmol), bis(pinacolato)diboron (1.96 g, 7.71 mmol), and Pd(dppf)Cl<sub>2</sub>·DCM complex (0.10 g, 0.13 mmol). The tube was purged with N<sub>2</sub>. Dioxane (N<sub>2</sub> bubbled, 20 cm<sup>3</sup>) was added to the reaction vessel and solution was stirred at 90 °C for 1 h. The reaction mixture was

cooled to room temperature. The mixture was poured into ice-water (100 cm<sup>3</sup>) and the product was extracted with Et<sub>2</sub>O (150 cm<sup>3</sup>). The organic layer was washed with brine (100 cm<sup>3</sup>), dried over anhydrous MgSO<sub>4</sub>, and concentrated under reduced pressure. The resulting viscous liquid was diluted with MeOH (60 cm<sup>3</sup>) at room temperature. An aqueous solution of KHF<sub>2</sub> (3 M, 11 cm<sup>3</sup>, 32 mmol) was added to the MeOH solution, resulting in the precipitation of solid product. After the suspension was stirred for 1 h, the solid was recovered by filtration and washed with a small amount of water. The crude product was purified by recrystallization from an acetonitrile/water mixture twice to give **dipotassium (1-C8)-BTZ**

**bis(trifluoroborate)** as colourless crystals (0.68 g, 79%); (Found: C, 38.03; H, 4.36; N, 9.42. C<sub>14</sub>H<sub>19</sub>H<sub>2</sub>F<sub>6</sub>K<sub>2</sub>N<sub>3</sub> requires C, 37.95; H, 4.32; N, 9.48%) <sup>1</sup>H NMR (400 MHz, DMSO-*d*<sub>6</sub>, δ) 7.04 (2H, s, Ar-H), 4.55 (2H, t, *J* = 7.5 Hz, NCH<sub>2</sub>), 1.94 - 1.86 (2H, m, NCH<sub>2</sub>CH<sub>2</sub>), 1.28 - 1.21 (10H, m). 0.81(3H, t, *J* = 7.0, CH<sub>3</sub>) <sup>13</sup>C NMR ( 100 MHz, DMSO-*d*<sub>6</sub>, δ) 147.31, 128.20, 55.62, 31.91, 30.76, 29.38, 29.32, 26.96, 22.73, 14.60 ppm; <sup>19</sup>F NMR (376 MHz, DMSO-*d*<sub>6</sub>, δ) -130.6 ppm(*d*, *J* = 18 Hz).

## TGA and DSC

Thermogravimetric analyses (TGA) were performed on a NETZSCH TG 209 F3 thermogravimetric analyzer at a heating rate of 10 °C min<sup>-1</sup> under a N<sub>2</sub> atmosphere.

Thermal transition behaviours of polymers were measured on a NETZSCH DSC 404 F1 modulated differential scanning calorimeter (DSC) at a heat/cool rate of 10 °C min<sup>-1</sup> under N<sub>2</sub> for three heat/cool cycles.

No appreciable glass transitions were detected in any of the polymers.

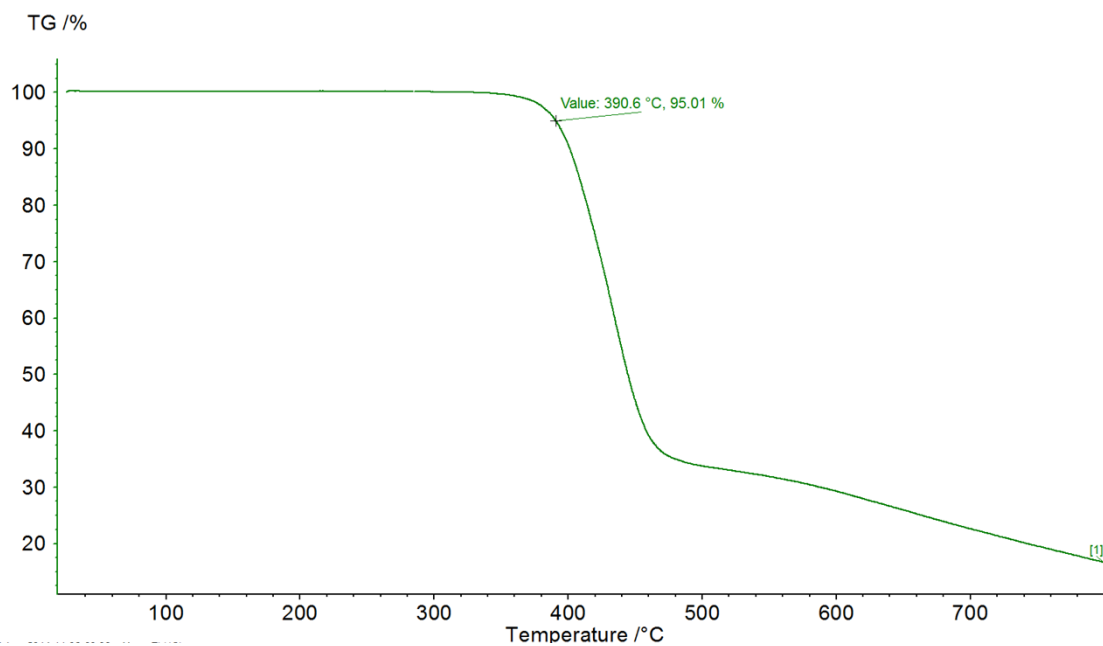

**Figure S 1.** TGA thermogram of (I-C18)-DPP-(b-C17)-BTZ.

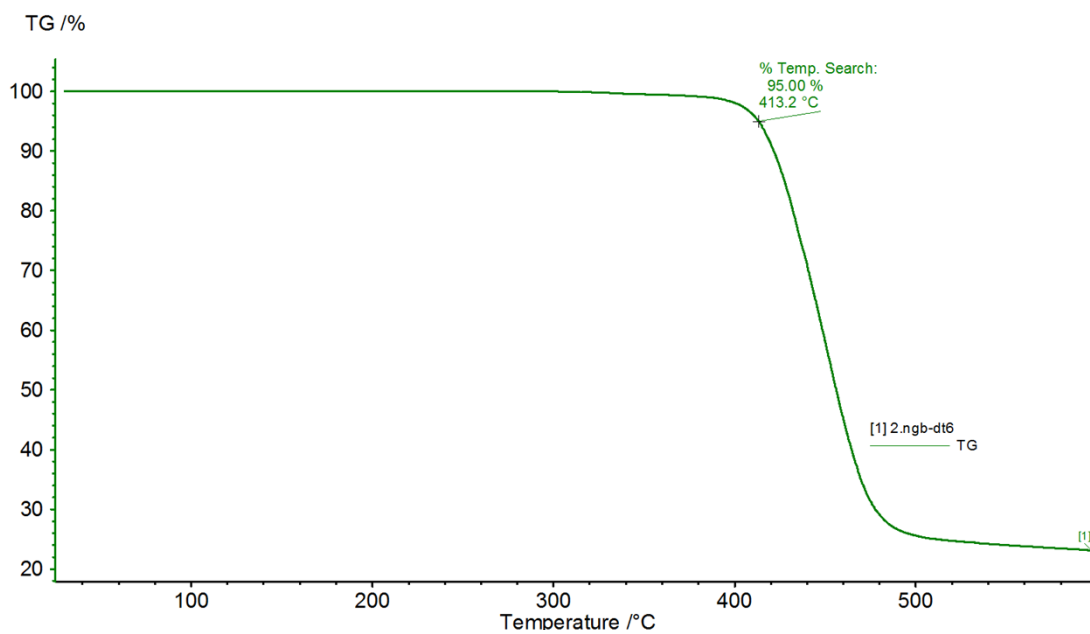

**Figure S 2.** TGA thermogram of (I-C18)-DPP-(I-C8)-BTZ.

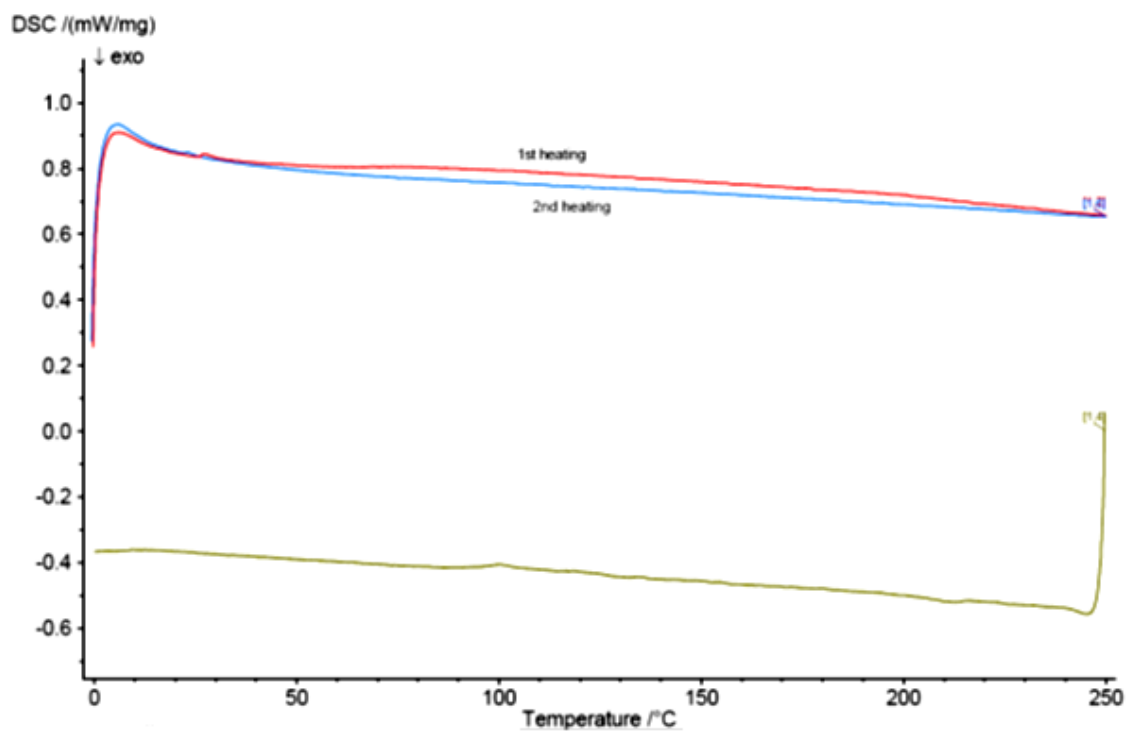

Figure S 3. DSC thermogram of (I-C18)-DPP-(b-C17)-BTZ.

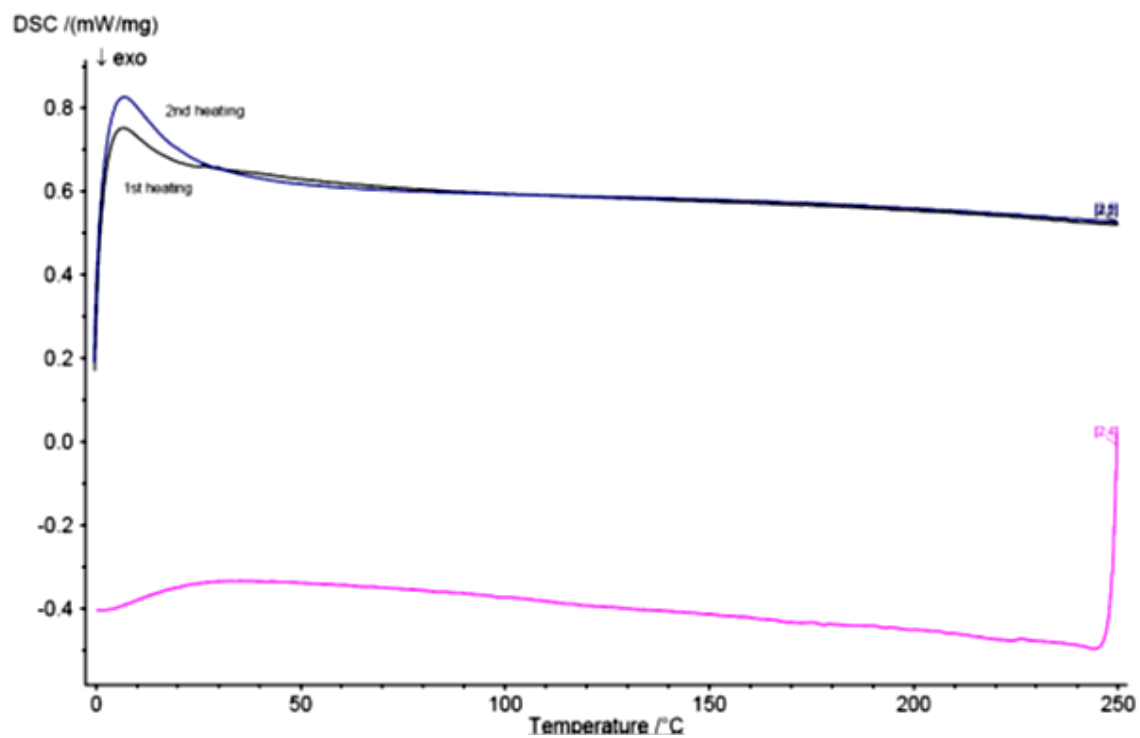

Figure S 4. DSC thermogram of (I-C18)-DPP-(l-C8)-BTZ.

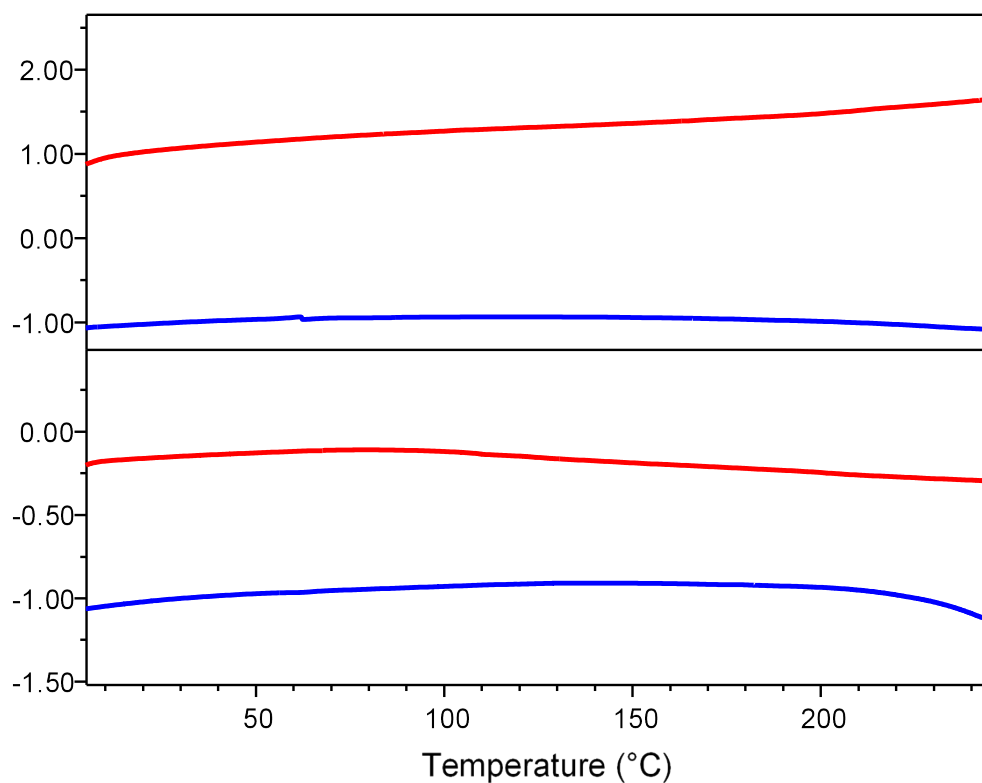

**Figure S 5.** DSC thermogram of **(1-C16)-DPP-(l-C8)-BTZ** (top) and **(b-C20)-DPP-(l-C8)-BTZ** (bottom) at 10°C min heating and cooling rate (second cycle shown, heating trace (red), cooling trace (blue)).

### **Gel permeation chromatography (GPC)**

Gel permeation chromatography for **(b-C20)-DPP-(l-C8)-BTZ** and **(1-C16)-DPP-(l-C8)-BTZ** were performed on a Agilent Technologies 1200 series GPC by eluting chlorobenzene at 80 °C, using two PL mixed B columns in series, and calibrated against narrow polydispersity polystyrene standards.

## Cyclic voltammetry

Cyclic voltammetry (CV) experiments for **(I-C18)-DPP-(b-C17)-BTZ** and **(I-C18)-DPP-(I-C8)-BTZ** were performed at a sweep rate of 50 mV/s. CVs were carried out in a three-electrode cell consisting of a glassy carbon working electrode, a platinum wire auxiliary electrode, and a Ag/Ag<sup>+</sup> pseudo-reference electrode. The supporting electrolyte was 0.10 M tetrabutylammonium hexafluorophosphate (Bu<sub>4</sub>NPF<sub>6</sub>) in CH<sub>3</sub>CN. The solutions were deoxygenated by sparging with argon prior to each scan and blanketed with argon during the scans. The glassy carbon working electrode was prepared by polishing with 5 μm alumina and washed and dried before the polymer was drop-casted on the electrode from chlorobenzene solution to form a film. Ferrocene/ferrocenium redox couple was used as the internal standard. The HOMO energy level was calculated from the onset of the oxidation potential of the polymer using the following:  $E_{\text{HOMO}} = - (4.8 + E_{\text{ox onset}}) \text{ eV}$ .

Table of electrochemical data

| Polymer                        | Oxidation onset (V) | Reduction onset (V) | Abs onset (nm) | Optical band gap (eV) | $E_{\text{HOMO}}$ (eV) | $E_{\text{LUMO}}$ (eV) |
|--------------------------------|---------------------|---------------------|----------------|-----------------------|------------------------|------------------------|
| P3HT                           | 0.10                | -                   | 650            | 1.91                  | -4.90                  | -2.99                  |
| <b>(I-C18)-DPP-(I-C8)-BTZ</b>  | 0.33                | -1.50               | 940            | 1.32                  | -5.13                  | -3.81                  |
| <b>(I-C18)-DPP-(b-C17)-BTZ</b> | 0.35                | -1.55               | 990            | 1.25                  | -5.15                  | -3.90                  |

Note that  $E_{\text{LUMO}}$  is calculated from  $E_{\text{HOMO}}$  and the optical band gap. The reduction onset values should not be used to estimate  $E_{\text{LUMO}}$  as the CV of the reduction process was not reversible.

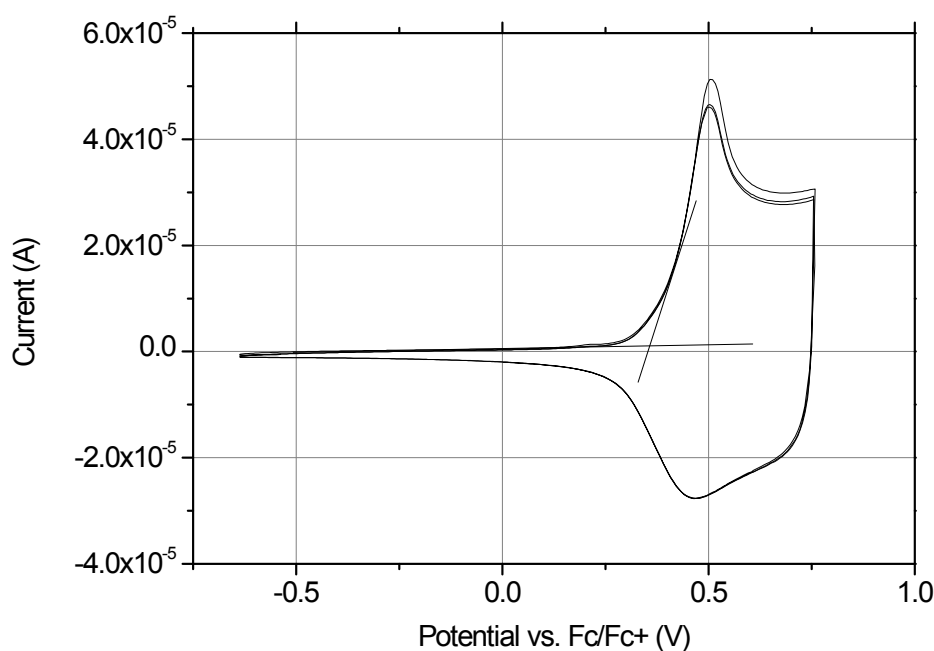

Cyclic voltammogram of **(I-C18)-DPP-(b-C17)-BTZ**.



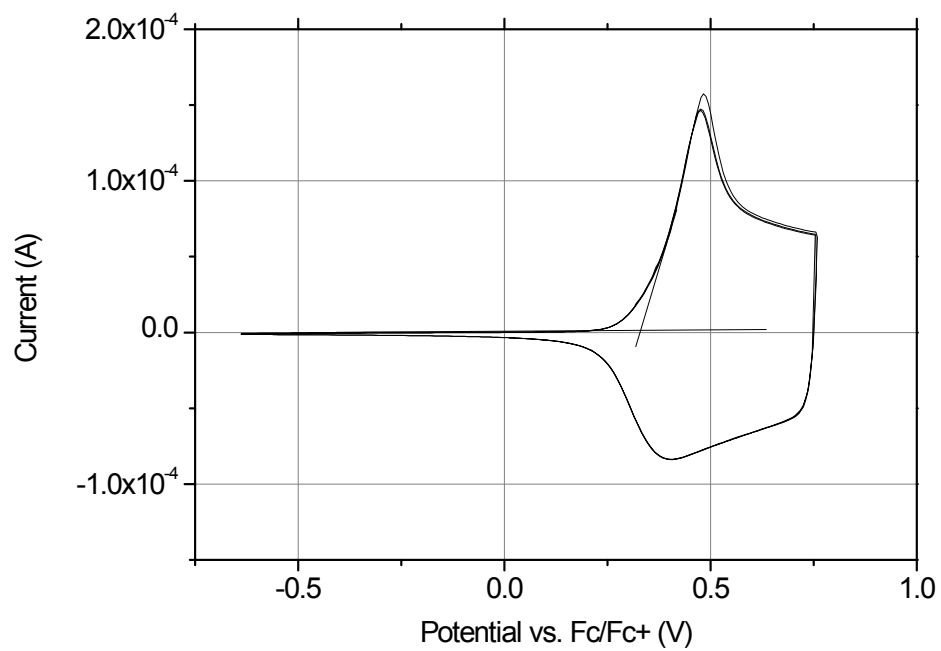

Cyclic voltammogram of **(I-C<sub>18</sub>)-DPP-(I-C<sub>8</sub>)-BTZ**.

## GIWAXS structural characterization

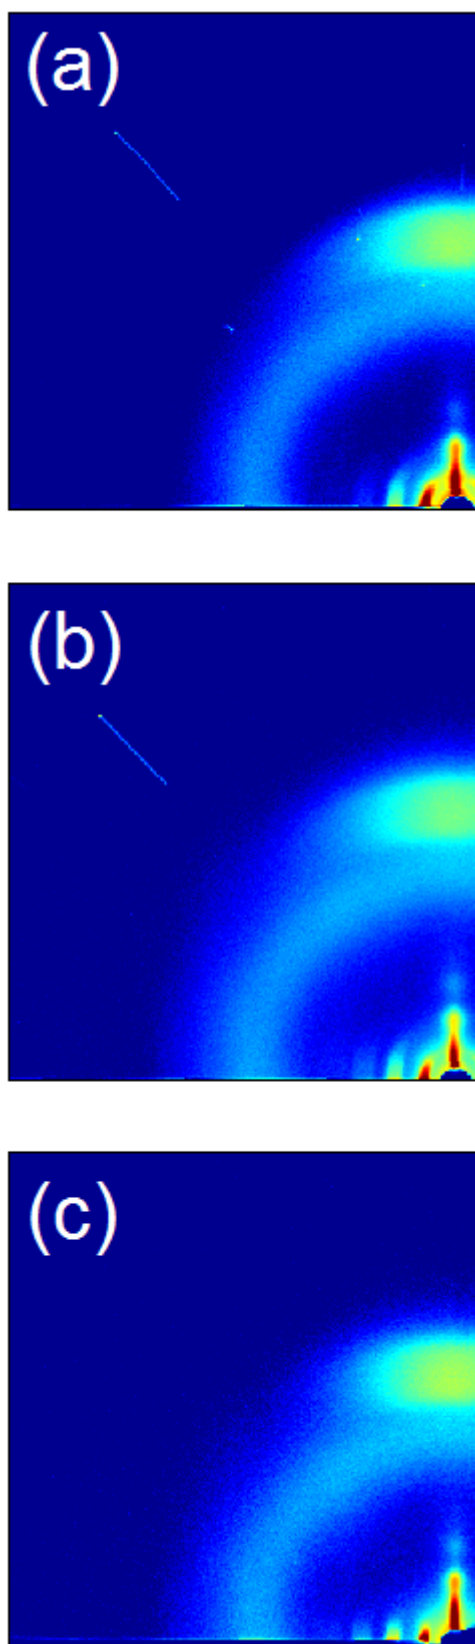

**Figure S 6:** 2D GIWAXS patterns of  $(l-C_{18})$ -DPP- $(b-C_{17})$ -BTZ films annealed at (a) 110 °C, (b) 200 °C and (c) 300 °C.

## Temperature dependent charge-transport

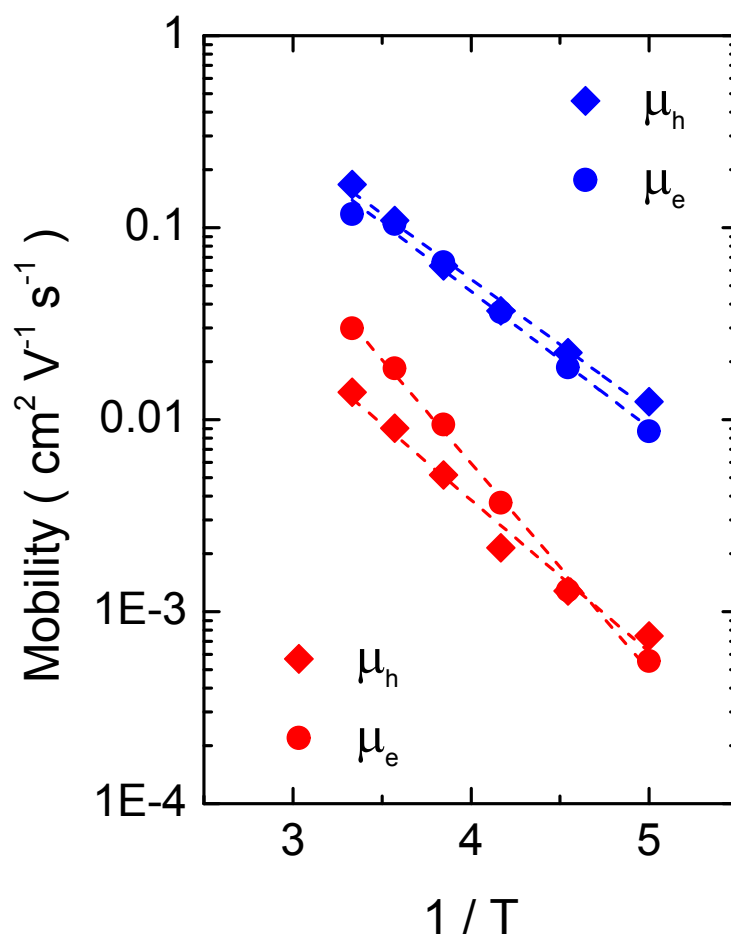

**Figure S 7:** Arrhenius plot of temperature dependent p-type field effect mobility of  $(b-C_{20})\text{-DPP-(l-C}_8\text{)-BTZ}$  (red) and  $(l-C_{16})\text{-DPP-(l-C}_8\text{)-BTZ}$  (blue). Lines are fitlines used to extract charge-carrier hopping activation energies.

### References

- [1] L. T. Dou, J. Gao, E. Richard, J. B. You, C. C. Chen, K. C. Cha, Y. J. He, G. Li, Y. Yang, *J. Am. Chem. Soc.* **2012**, *134*, 10071.
- [2] B. Y. Fu, J. Baltazar, A. R. Sankar, P. H. Chu, S. Y. Zhang, D. M. Collard, E. Reichmanis, *Adv. Funct. Mater.* **2014**, *24*, 3734.
- [3] T. Nakanishi, Y. Shirai, T. Yasuda, L. Y. Han, *J. Polym. Sci., Part A.* **2012**, *50*, 4829.
